# Supplementary material
Source: PubMed Central journal article supplement (PMC4808241)
Supplement: NIHMS756246-supplement-supplement_1.pdf [file NIHMS756246-supplement-supplement_1.pdf]

**Supplemental Table 1:** International Classification of Diseases, Ninth Edition (ICD-9) codes used to define comorbidities and outcomes

| <b>Comorbidities</b>                       | <b>ICD-9 Codes</b>                                                                                                                                                                                                                  |
|--------------------------------------------|-------------------------------------------------------------------------------------------------------------------------------------------------------------------------------------------------------------------------------------|
| <b>Cardiovascular</b>                      |                                                                                                                                                                                                                                     |
| Percutaneous coronary intervention history | 00.66, 36.01, 36.02, 36.05, 36.06, 36.07, 36.09, v45.82                                                                                                                                                                             |
| Coronary artery bypass graft history       | 36.1x, v45.81                                                                                                                                                                                                                       |
| Myocardial infarction                      | 410.x, 412                                                                                                                                                                                                                          |
| Angina                                     | 411.x, 413.x                                                                                                                                                                                                                        |
| Heart failure                              | 398.91, 402.01, 402.11, 402.91, 404.01, 404.03, 404.13, 404.91, 428.x,                                                                                                                                                              |
| Hypertension                               | 401.0, 401.1, 401.9, 402.x, 403.x, 404.x, 405.x                                                                                                                                                                                     |
| Atrial fibrillation                        | 427.3x                                                                                                                                                                                                                              |
| Other Arrhythmia                           | 426.x, 427.0, 427.20, 427.81, 427.9, 427.1, 427.4x, 37.9x, 996.04, v53.32, 37.7x, 37.8x, 996.01, v45.00, v45.01, v45.02, v45.09, v53.31                                                                                             |
| Stroke/Transient ischemic attack           | 433.x, 434.x, 435.x, 436.00                                                                                                                                                                                                         |
| Valvular disease                           | 394.x-397.1, 424.x, 746.3-746.6, v42.2, v43.3                                                                                                                                                                                       |
| Peripheral arterial disease                | 38.03, 38.04, 38.05, 38.08, 38.33-38.48, 39.22-39.29, 440.2x, 440.3x, 440.4x, 441.x, 443.x, 445.x, 447.10, 557.10, 557.90, v43.4,                                                                                                   |
| Cerebrovascular disease                    | 433.x, 434.x, 437.x, 438.x.                                                                                                                                                                                                         |
| <b>Other Comorbid Conditions</b>           |                                                                                                                                                                                                                                     |
| Diabetes mellitus                          | 249.x, 250.x, 357.2, 362.0x                                                                                                                                                                                                         |
| Hyperlipidemia                             | 272.x                                                                                                                                                                                                                               |
| Gastrointestinal bleed                     | 456.00, 456.0, 456.20, 530.21, 530.70, 530.82, 531.0x, 531.2x, 531.4x, 531.6x, 532.2x, 532.4x, 532.6x, 533.0x, 533.2x, 534.0x, 534.2x, 534.4x, 534.6x, 535.x1, 537.83, 537.84, 562.02, 562.03, 562.12, 562.13, 569.3, 569.85, 578.x |
| Peptic ulcer disease                       | 531.7, 531.0, 531.71, 531.9, 531.90, 531.91, 532.7, 532.70, 532.71, 532.9x, 533.7x, 534.7x, 534.9x                                                                                                                                  |
| Intracranial hemorrhage                    | 430, 431.00, 432.x                                                                                                                                                                                                                  |
| Liver disease                              | 070.x, 456.1, 456.21, 570-573.x, v42.7                                                                                                                                                                                              |

|                       |                                                                    |
|-----------------------|--------------------------------------------------------------------|
| Chronic lung disease  | 490, 491.x-496, 500-505, 506.4, 516.x                              |
| Smoking history       | 305.1x                                                             |
| Dementia              | 290.x, 294.1x, 331.x                                               |
| Depression            | 296.2x, 296.3x, 296.5x, 296.82, 300.40, 301.12, 309.0, 309.10, 311 |
| Systemic cancer       | 140.x-165.x, 170.x-172.x, 174.x, 175.x, 180.x-209.x, 238.6, 273.3  |
| Hypothyroidism        | 243, 244.x                                                         |
| Obesity               | 278.0x, 649.1x, v85.3x, v85.4                                      |
|                       |                                                                    |
| <b>Outcomes</b>       |                                                                    |
| Myocardial Infarction |                                                                    |
| Primary               | 410.xx                                                             |
| Secondary             | 410.x1                                                             |
| Primary or secondary  | 430, 431, 432, 432.0, 432.1, 432.9                                 |

| <b>Supplemental Table 2:</b> Odds ratio and 95% confidence intervals for receipt of bare metal stent ( <i>versus</i> drug-eluting stent) in patients with end-stage renal disease on dialysis undergoing percutaneous coronary intervention |            |                            |                            |
|---------------------------------------------------------------------------------------------------------------------------------------------------------------------------------------------------------------------------------------------|------------|----------------------------|----------------------------|
|                                                                                                                                                                                                                                             | Odds ratio | Lower 95% confidence limit | Upper 95% confidence limit |
| <b>Demographics</b>                                                                                                                                                                                                                         |            |                            |                            |
| Age, per 1 year increase                                                                                                                                                                                                                    | 0.99       | 0.99                       | 1.00                       |
| Female sex                                                                                                                                                                                                                                  | 1.12       | 1.06                       | 1.17                       |
| Race (vs white)                                                                                                                                                                                                                             |            |                            |                            |
| Asian                                                                                                                                                                                                                                       | 1.12       | 0.98                       | 1.27                       |
| Black                                                                                                                                                                                                                                       | 0.96       | 0.91                       | 1.01                       |
| Other/Unknown                                                                                                                                                                                                                               | 0.97       | 0.83                       | 1.14                       |
| Hemodialysis (versus peritoneal dialysis)                                                                                                                                                                                                   | 0.98       | 0.90                       | 1.07                       |
| Vintage, per 1 year increase                                                                                                                                                                                                                | 0.99       | 0.98                       | 0.99                       |
| Cause of end-stage renal disease (vs other/unknown)                                                                                                                                                                                         |            |                            |                            |
| Diabetes                                                                                                                                                                                                                                    | 1.13       | 1.04                       | 1.23                       |
| Hypertension                                                                                                                                                                                                                                | 0.91       | 0.81                       | 1.01                       |
| Glomerulonephritis                                                                                                                                                                                                                          | 0.97       | 0.90                       | 1.06                       |
| Non-nephrology outpatient visits, per 1 visit increase                                                                                                                                                                                      | 1.00       | 1.00                       | 1.00                       |
| Hospital days in 6m prior, per 1 day increase                                                                                                                                                                                               | 1.00       | 1.00                       | 1.00                       |
| Any nursing home stay                                                                                                                                                                                                                       | 1.02       | 0.93                       | 1.12                       |
| On kidney transplant waiting list                                                                                                                                                                                                           | 0.91       | 0.85                       | 0.98                       |
| Multivessel intervention                                                                                                                                                                                                                    | 1.35       | 1.27                       | 1.45                       |
| Index Presentation (vs unstable angina)                                                                                                                                                                                                     |            |                            |                            |
| Stable coronary artery disease                                                                                                                                                                                                              | 0.91       | 0.64                       | 1.29                       |

|                                            |      |      |      |
|--------------------------------------------|------|------|------|
| ST-elevation myocardial infarction         | 0.54 | 0.38 | 0.77 |
| Non-ST elevation myocardial infarction     | 1.00 | 0.71 | 1.41 |
| Cardiovascular Comorbidities               |      |      |      |
| Coronary artery bypass grafting history    | 0.85 | 0.81 | 0.90 |
| Percutaneous coronary intervention history | 1.24 | 1.16 | 1.32 |
| Myocardial infarction                      | 0.98 | 0.92 | 1.05 |
| Angina                                     | 1.15 | 1.10 | 1.21 |
| Heart failure                              | 1.07 | 1.01 | 1.14 |
| Hypertension                               | 0.55 | 0.30 | 0.99 |
| Atrial fibrillation                        | 0.94 | 0.89 | 0.99 |
| Other arrhythmia                           | 0.94 | 0.89 | 0.99 |
| Stroke/Transient ischemic attack           | 0.98 | 0.92 | 1.04 |
| Valvular disease                           | 0.93 | 0.88 | 0.97 |
| Peripheral arterial disease                | 1.02 | 0.97 | 1.07 |
| Cerebrovascular disease                    | 1.04 | 0.98 | 1.10 |
| Other comorbid conditions                  |      |      |      |
| Diabetes mellitus                          | 1.12 | 1.05 | 1.20 |
| Hyperlipidemia                             | 1.03 | 0.98 | 1.09 |
| Gastrointestinal bleeding                  | 0.93 | 0.88 | 0.98 |
| Peptic ulcer disease                       | 0.94 | 0.86 | 1.02 |
| Intracranial hemorrhage                    | 0.77 | 0.67 | 0.90 |
| Liver disease                              | 0.94 | 0.89 | 1.00 |
| Chronic lung disease                       | 0.98 | 0.93 | 1.03 |
| Smoking history                            | 0.85 | 0.80 | 0.91 |
| Dementia                                   | 1.00 | 0.91 | 1.10 |
| Depression                                 | 0.98 | 0.93 | 1.04 |
| Cancer                                     | 0.91 | 0.85 | 0.98 |

|                                       |      |      |      |
|---------------------------------------|------|------|------|
| Hypothyroid                           | 1.00 | 0.94 | 1.06 |
| Obesity                               | 0.97 | 0.91 | 1.03 |
| Census Region (vs West South Central) |      |      |      |
| Unknown                               | 1.47 | 0.29 | 7.42 |
| East North Central                    | 0.97 | 0.90 | 1.05 |
| West North Central                    | 1.10 | 0.99 | 1.23 |
| East South Central                    | 1.07 | 0.97 | 1.19 |
| Mid Atlantic                          | 1.26 | 1.15 | 1.37 |
| Mountain                              | 1.31 | 1.15 | 1.48 |
| Northeast                             | 1.08 | 0.94 | 1.24 |
| Pacific                               | 1.38 | 1.25 | 1.51 |
| South Atlantic                        | 1.18 | 1.09 | 1.27 |
